# Supplementary material for: Parallel multiphase nanofluidics utilizing nanochannels with partial hydrophobic surface modification and application to femtoliter solvent extraction
Source: Royal Society of Chemistry journal article supplement (doi:10.1039/c9lc00793h), 2019-01-01
Supplement: c9lc00793h1.pdf [file c9lc00793h1.pdf]

**Electronic Supplementary Information:**

Parallel Multiphase Nanofluidics Utilizing Nanochannel  
with Partial Hydrophobic Surface Modification and  
Application to Femtoliter Solvent Extraction

Yutaka Kazoe, Takuya Ugajin, Ryoichi Ohta, Kazuma Mawatari and Takehiko Kitamori

## Supplementary Figure

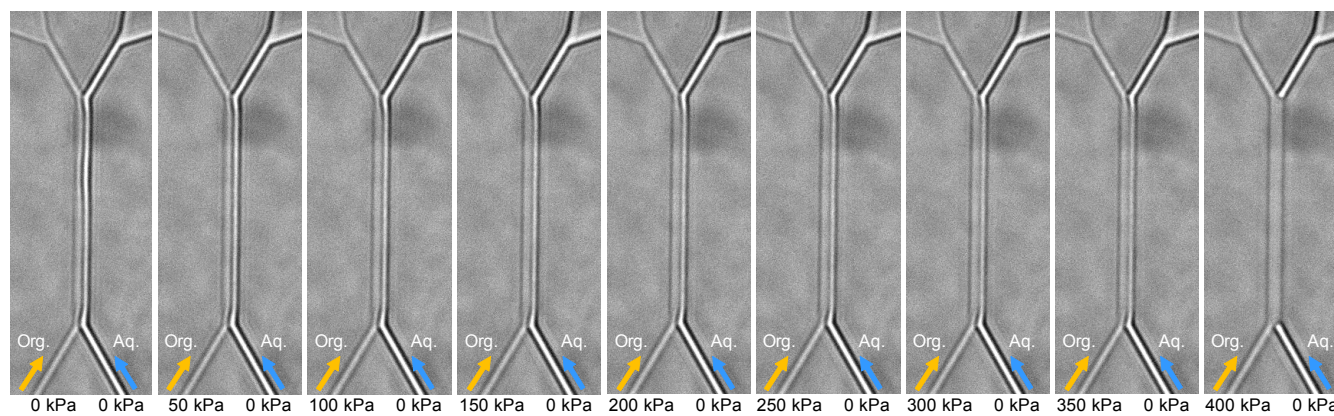

**Figure S1.** Observation of water/dodecane parallel two-phase flow in an 890 nm nanochannel with partial hydrophobic surface modification. The external pressure applied to the aqueous phase was 0 kPa, and those to the organic phase was changed from 0 to 400 kPa at 50 kPa intervals.
